# Supplementary material for: Photophysical properties of free-base and manganese(iii) N-confused porphyrins
Source: Royal Society of Chemistry journal article supplement (doi:10.1039/c8cp02223b), 2018-01-01
Supplement: c8cp02223b1.pdf [file c8cp02223b1.pdf]

## Supporting Information

for

# Photophysical properties of free-base and manganese(III) N-confused porphyrins

Li-Li Wang,<sup>1</sup> Su-Hong Peng,<sup>2,3</sup> Hui Wang,<sup>\*,1</sup> Liang-Nian Ji,<sup>1,4</sup> and Hai-Yang Liu<sup>\*,2</sup>

<sup>1</sup> State Key Laboratory of Optoelectronics Materials and Technologies, Sun Yat-Sen University,

Guangzhou 510275, China

<sup>2</sup> Department of Chemistry, South China University of Technology, Guangzhou 510641, China

<sup>3</sup> College of Chemistry and Bioengineering, Yichun University, Yichun 336000, China

<sup>4</sup> School of Chemistry and Chemical Engineering/MOE Laboratory of Bioinorganic and Synthetic

Chemistry, Sun Yat-Sen University, Guangzhou 510275, China

## 1. $^1\text{H}$ NMR Spectra of $\text{NCH}_3\text{NCTPPs}$ .

$\text{NCTPPs}$  and  $\text{NCH}_3\text{NCTPPs}$  were characterized by  $^1\text{H}$  NMR.<sup>1</sup>  $\text{Mn}(\text{Cl})\text{NCH}_3\text{NCTPPs}$  have been characterized by HR-MS spectroscopy.<sup>1</sup> The  $^1\text{H}$  NMR spectra of  $\text{NCH}_3\text{NCTPPs}$  in  $\text{CDCl}_3$  were recorded by using a Bruker Avance III 400 MHz spectrometer, which are shown in Figs. S1–S6. The  $^1\text{H}$  NMR chemical shifts ( $\delta$ ) were determined with tetramethylsilane (TMS) as the internal reference and reported in parts per million (ppm). The  $^1\text{H}$  NMR assignments for all protons of  $\text{NCH}_3\text{NCTPPs}$  are as followed: 1, the inner CH proton; 2, the inner NH proton; 3, three protons of the  $N\text{-CH}_3$  group; 4, seven peripheral pyrrolic C–H protons; 5, sixteen or twenty *meso* aryl protons; 6, twelve protons of the substituents of *meso*-phenyl rings. Impurity peaks marked with asterisks may be assigned to be the signals of the residual solvents: \*, *n*-hexane; \*, water; \*, methanol; \*, DCM.<sup>2</sup>

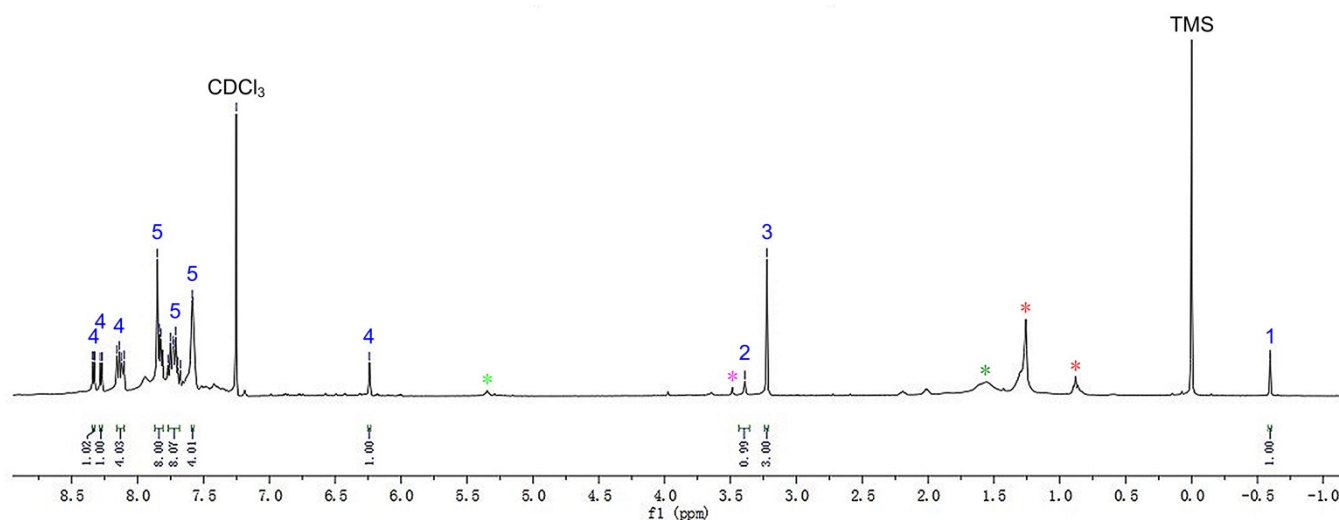

**Fig. S1**  $^1\text{H}$  NMR spectrum of  $\text{NCH}_3\text{NCTPP}$  with *para*-H recorded in  $\text{CDCl}_3$ .

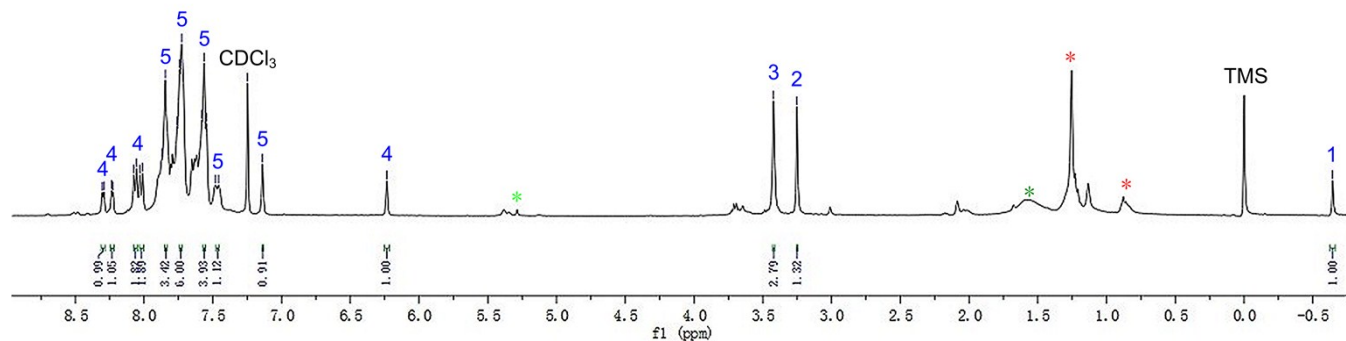

**Fig. S2** <sup>1</sup>H NMR spectrum of NCH<sub>3</sub>NCTPP with *para*-Cl recorded in CDCl<sub>3</sub>.

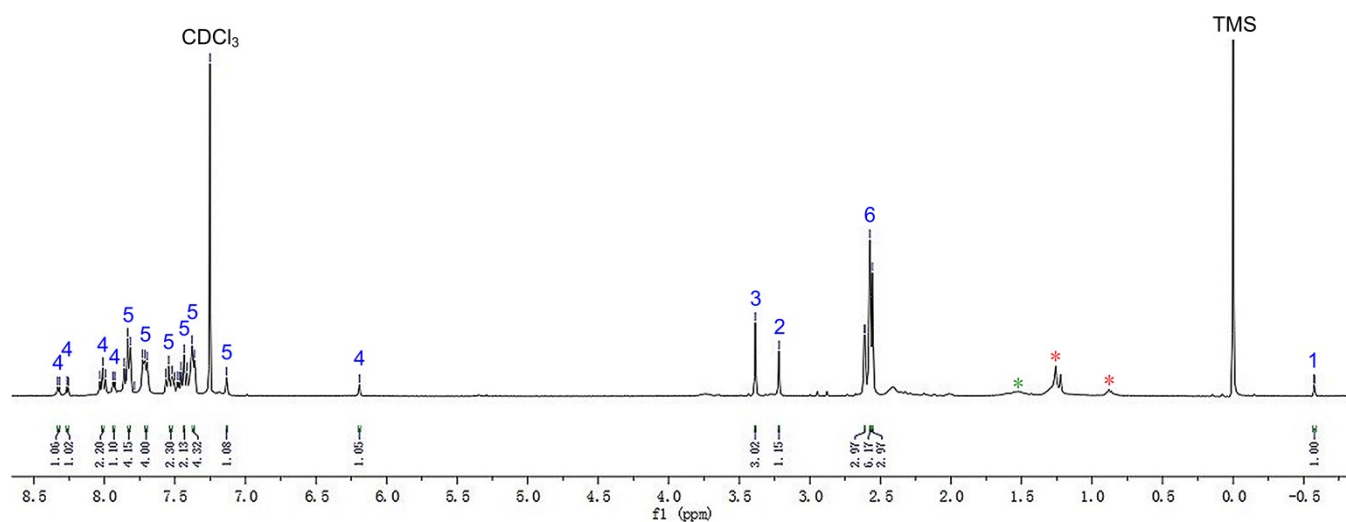

**Fig. S3** <sup>1</sup>H NMR spectrum of NCH<sub>3</sub>NCTPP with *para*-CH<sub>3</sub> recorded in CDCl<sub>3</sub>.

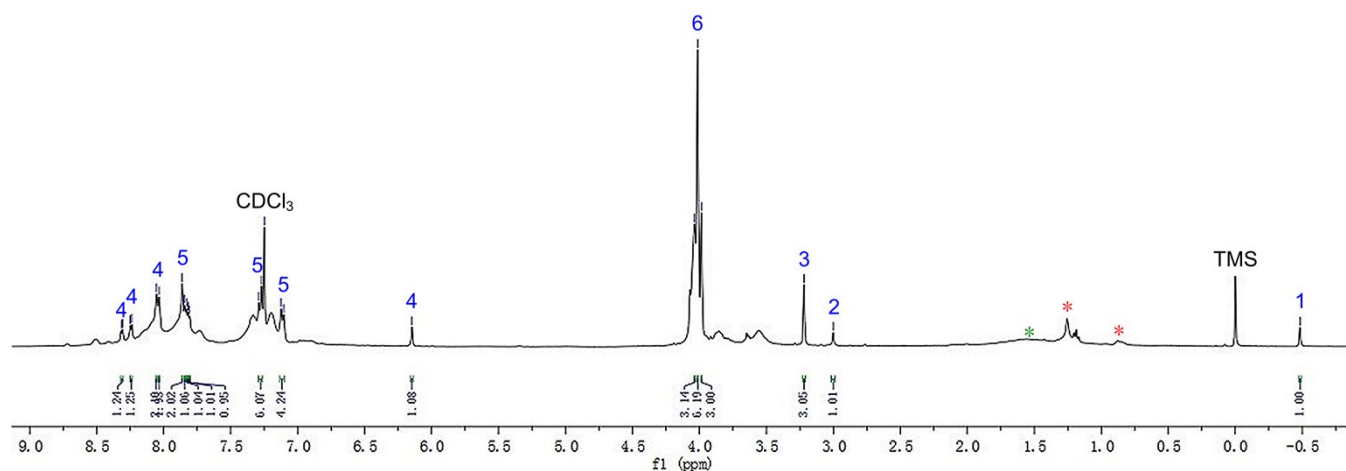

**Fig. S4** <sup>1</sup>H NMR spectrum of NCH<sub>3</sub>NCTPP with *para*-OCH<sub>3</sub> recorded in CDCl<sub>3</sub>.

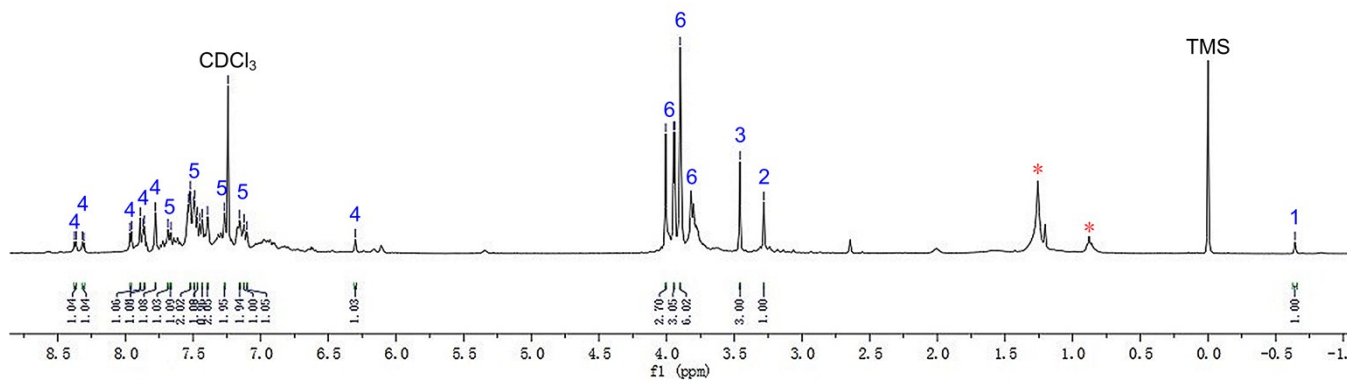

**Fig. S5** <sup>1</sup>H NMR spectrum of NCH<sub>3</sub>NCTPP with *meta*-OCH<sub>3</sub> recorded in CDCl<sub>3</sub>.

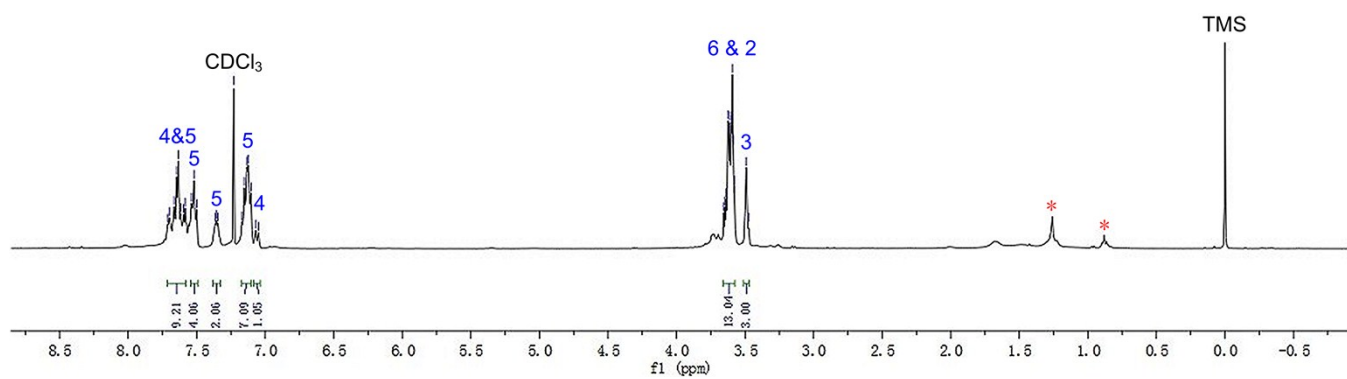

**Fig. S6** <sup>1</sup>H NMR spectrum of NCH<sub>3</sub>NCTPP with *ortho*-OCH<sub>3</sub> recorded in CDCl<sub>3</sub>.

## 2. Nanosecond Transient Absorption Measurement of N-confused Porphyrins.

The triplet state dynamics of Mn(Cl)NCH<sub>3</sub>NCTPPs and NCTPP with *para*-H were measured using laser flash photolysis apparatus with 532-nm excitation.<sup>3</sup> The triplet absorption decay curves were well fitted with a single-exponential function convoluted with a Gaussian response function. The triplet quantum yield of NCTPP with *para*-H was calculated to be 0.30, using TPP in toluene as a reference ( $\Phi_{T(\text{std})} = 0.80$ ,  $\epsilon_{T(\text{std})} \approx 35000 \text{ M}^{-1}\text{cm}^{-1}$ ).<sup>3, 4</sup> The T<sub>1</sub>-state lifetime of NCTPP with *para*-H in deaerated toluene is fitted to be 47.5  $\mu\text{s}$ , which is in agreement with the earlier report.<sup>5</sup> Unfortunately, the <sup>7</sup>T<sub>1</sub>-state absorption of Mn(Cl)NCH<sub>3</sub>NCTPPs in deaerated DCM were not detected by using the same experimental apparatus.

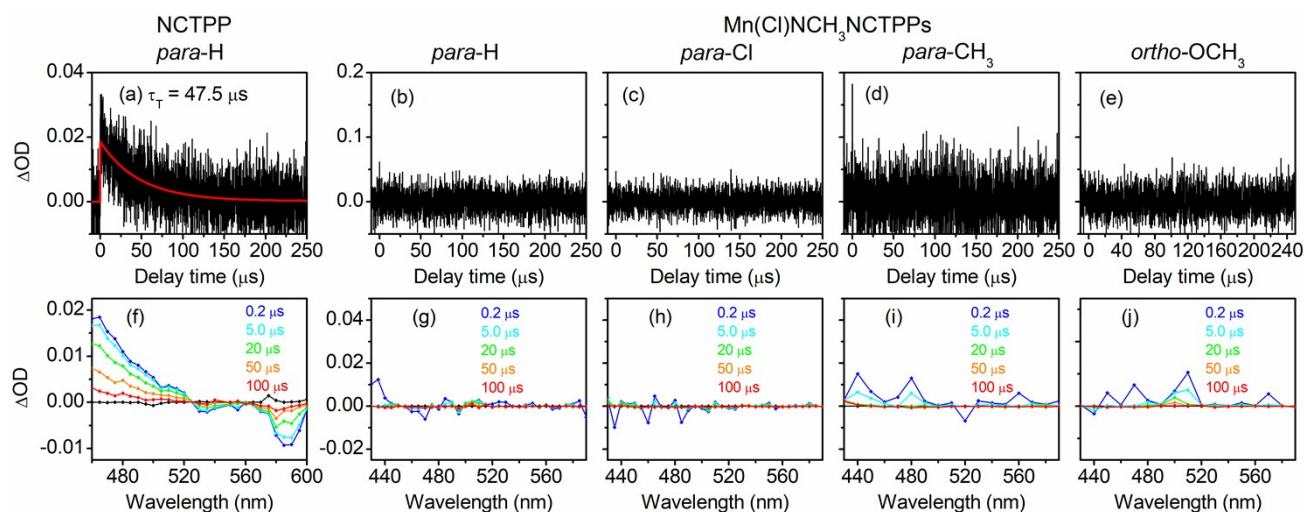

**Fig. S7** Triplet kinetics (a–e) and spectra (f–j) of NCTPP with *para*-H in deaerated toluene and four Mn(Cl)NCH<sub>3</sub>NCTPPs in deaerated DCM. Sample concentration was about 34  $\mu\text{M}$ .

### 3. Steady-state Absorption Spectra of Solvents.

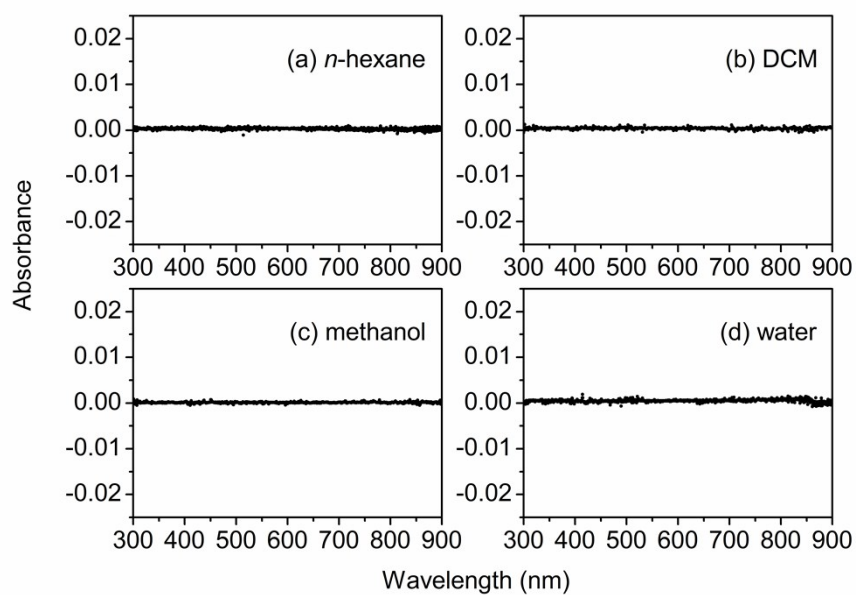

**Fig. S8** Steady-state absorption spectra of solvents: (a) *n*-hexane, (b) DCM, (c) methanol, and (d) water.

## References

1. S.-H. Peng, M. H. R. Mahmood, H.-B. Zou, S.-B. Yang and H.-Y. Liu, *J. Mol. Catal. A: Chem.*, 2014, 395, 180-185.
2. H. E. Gottlieb, V. Kotlyar and A. Nudelman, *J. Org. Chem.*, 1997, 62, 7512-7515.
3. W. Shao, H. Wang, S. He, L. Shi, K. Peng, Y. Lin, L. Zhang, L. Ji and H. Liu, *J. Phys. Chem. B*, 2012, 116, 14228-14234.
4. A. C. Pelegrino, M. M. Carolina, A. F. Gotardo, A. R. Simioni, M. D. Assis and A. C. Tedesco, *Photochem. Photobiol.*, 2005, 81, 771-776.
5. E. A. Alemán, C. S. Rajesh, C. J. Ziegler and D. A. Modarelli, *J. Phys. Chem. A*, 2006, 110, 8605-8612.
